# Supplementary material for: Trophic Position of the White Worm (Enchytraeus albidus) in the Context of Digestive Enzyme Genes Revealed by Transcriptomics Analysis
Source: Int J Mol Sci. 2024 Apr 25;25(9):4685. doi: 10.3390/ijms25094685 (PMC11083476; doi:10.3390/ijms25094685)
Supplement: Supplementary file 1 [file ijms-25-04685-s001.zip]

Archive with 6 entries (6 files):
- Supplementary Data S1. Sequence data.tar
- Supplementary Figure S1. ENDscipt secondary structure alignment of the Ealb-Eg I with other endo-beta-1,4-glucanases.tif
- Supplementary Figure S2. PCR-RF-SSCP analysis of the COI barcodes.pdf
- Supplementary Table S1. BLASTp searches of endo-beta-1,4-glucanase.xlsx
- Supplementary Table S2. BLASTp searches of digestive i-type lysozyme.xlsx
- Supplementary Table S3. Sequencing run IDs for the additional data assembly.xlsx
