# Supplementary material for: Trophic Position of the White Worm (Enchytraeus albidus) in the Context of Digestive Enzyme Genes Revealed by Transcriptomics Analysis
Source: Int J Mol Sci. 2024 Apr 25;25(9):4685. doi: 10.3390/ijms25094685 (PMC11083476; doi:10.3390/ijms25094685)
Supplement: Supplementary file 1 [file ijms-25-04685-s001.zip › Supplementary Table S1. BLASTp searches of endo-beta-1,4-glucanase.xlsx]

## Sheet: Arkusz2
Query (mature protein sequence)	Best Hit Acc.	% Identity	% Positives	Evalue
AAX92641.1_beta-14-endoglucanase_Eisenia_andrei	AAX92641.1	100.000	100.00	0.0
ACE75510.1_beta-14-endoglucanase_Eisenia_andrei	ACE75510.1	100.000	100.00	0.0
ACE75511.1_beta-14-endoglucanase_Eisenia_andrei	ACE75511.1	100.000	100.00	0.0
BAH22180.1_beta-14-endoglucanase_Metaphire_hilgendorfi	BAH22180.1	100.000	100.00	0.0
BAM14716.1_endo-1_4-beta-glucanase_Eisenia_fetida	BAM14716.1	100.000	100.00	0.0
BAT21145.1_beta-14-endoglucanase_Eisenia_fetida	BAT21145.1	100.000	100.00	0.0
QID88586.1_endo-14-beta-glucanase_Eisenia_andrei	QID88586.1	100.000	100.00	0.0
QID88587.1_endo-14-beta-glucanase_Eisenia_andrei	QID88587.1	100.000	100.00	0.0
QID88588.1_endo-14-beta-glucanase_Eisenia_andrei	QID88588.1	100.000	100.00	0.0
Capilloventer_australis_SRR10997420_DN7005_c0_g1_i2	BAH22180.1	73.893	83.92	0.0
Capilloventer_australis_SRR8799324_DN3230_c0_g3_i1	BAH22180.1	73.660	84.15	0.0
Capilloventer_australis_SRR8799324_DN3230_c0_g3_i2	BAH22180.1	73.660	84.15	0.0
Capilloventer_australis_SRR8799324_DN3230_c0_g3_i3	BAH22180.1	73.660	84.15	0.0
Capilloventer_australis_SRR8799324_DN5678_c0_g1_i2	BAH22180.1	72.494	83.22	0.0
Capilloventer_australis_SRR8799324_DN6073_c0_g2_i1	BAH22180.1	70.423	79.58	0.0
Carpetania_elisae_SRR786598_DN155_c0_g1_i7	BAH22180.1	84.687	90.26	0.0
Carpetania_elisae_SRR786598_DN291_c0_g1_i1	BAH22180.1	84.687	90.26	0.0
Enchytraeus_albidus_German_DN291_c0_g1_i1	BAH22180.1	70.998	83.06	0.0
Enchytraeus_albidus_German_DN291_c0_g1_i11	QID88588.1	71.495	82.48	0.0
Enchytraeus_albidus_German_DN291_c0_g1_i12	BAH22180.1	71.495	83.41	0.0
Enchytraeus_albidus_German_DN291_c1_g1_i6	BAH22180.1	70.766	82.83	0.0
Enchytraeus_albidus_German_DN291_c1_g1_i9	BAH22180.1	71.262	83.18	0.0
Enchytraeus_albidus_Nuuk_DN166_c0_g2_i11	BAH22180.1	70.534	82.37	0.0
Enchytraeus_albidus_Nuuk_DN166_c0_g2_i14	BAH22180.1	70.998	82.13	0.0
Enchytraeus_albidus_Nuuk_DN166_c0_g2_i15	BAH22180.1	70.766	82.13	0.0
Enchytraeus_albidus_Nuuk_DN166_c0_g2_i26	BAH22180.1	70.766	81.90	0.0
Enchytraeus_albidus_Nuuk_DN166_c0_g2_i6	BAH22180.1	70.998	82.13	0.0
Enchytraeus_albidus_Nuuk_DN166_c0_g2_i9	BAH22180.1	69.321	84.31	0.0
Enchytraeus_albidus_Nuuk_DN1982_c0_g1_i11	BAH22180.1	71.926	83.29	0.0
Enchytraeus_albidus_Nuuk_DN1982_c0_g1_i20	BAH22180.1	71.694	83.53	0.0
Enchytraeus_albidus_Nuuk_DN1982_c0_g1_i22	QID88588.1	71.897	83.14	0.0
Enchytraeus_albidus_Nuuk_DN1982_c0_g1_i29	BAH22180.1	72.622	83.76	0.0
Enchytraeus_albidus_Nuuk_DN1982_c0_g1_i30	BAH22180.1	70.998	82.37	0.0
Enchytraeus_albidus_Nuuk_DN1982_c0_g1_i32	BAH22180.1	70.766	82.37	0.0
Enchytraeus_albidus_Nuuk_DN1982_c0_g1_i34	BAH22180.1	71.230	82.60	0.0
Enchytraeus_albidusPL-A_DN3132_c2_g1_i2	BAH22180.1	68.837	84.65	0.0
Enchytraeus_albidusPL-A_DN9119_c0_g1_i1	QID88588.1	71.729	83.41	0.0
Enchytraeus_albidusPL-A_DN9119_c0_g1_i5	BAH22180.1	71.262	84.11	0.0
Enchytraeus_crypticus_SRR10997417_DN1102_c0_g1_i6	BAH22180.1	69.789	83.84	0.0
Enchytraeus_crypticus_SRR10997417_DN588_c0_g1_i1	BAH22180.1	70.093	82.94	0.0
Enchytraeus_crypticus_SRR10997417_DN693_c0_g1_i2	BAH22180.1	70.327	82.94	0.0
Glossoscolex_paulistus_GBIL01.1_TSA_GBIL01030463.1.p2	BAH22180.1	86.079	91.88	0.0
Grania_simonae_SRR10997449_DN2179_c0_g4_i1	ACE75511.1	67.824	80.56	0.0
Guaranidrilus_sp._SRR10997448_DN2158_c0_g1_i5	BAH22180.1	64.720	78.27	0.0
Hrabeiella_periglandulata_SRR10997424_DN1243_c0_g2_i3	QID88588.1	62.037	76.16	0.0
Hrabeiella_periglandulata_SRR10997424_DN943_c0_g2_i2	ACE75511.1	65.429	76.10	0.0
Lumbriculus_variegatus_SRR12619268-SRR12619270_DN10_c0_g1_i15	BAH22180.1	75.406	84.22	0.0
Lumbriculus_variegatus_SRR12619268-SRR12619270_DN3355_c0_g1_i70	BAH22180.1	74.942	83.76	0.0
Lumbricus_castaneus_SRR7287337_DN487_c0_g1_i10	ACE75511.1	84.988	91.22	0.0
Lumbricus_castaneus_SRR7287337_DN487_c0_g1_i13	ACE75511.1	85.450	91.45	0.0
Lumbricus_castaneus_SRR7287337_DN487_c0_g1_i19	QID88586.1	85.151	91.65	0.0
Lumbricus_castaneus_SRR7287337_DN487_c0_g1_i27	QID88586.1	84.758	91.69	0.0
Lumbricus_castaneus_SRR7287337_DN487_c0_g1_i7	QID88586.1	84.988	91.45	0.0
Lumbricus_rubellus_SRR10752881__c0_g1_i7	ACE75510.1	83.333	91.44	0.0
Lumbricus_rubellus_SRR10752881__DN268_c0_g1_i4	ACE75510.1	83.796	91.20	0.0
Lumbricus_rubellus_SRR10752881__DN912_c0_g1_i12	AAX92641.1	82.870	90.74	0.0
Lumbricus_rubellus_SRR10752881__DN912_c0_g1_i7	QID88586.1	82.639	90.51	0.0
Lumbricus_rubellus_SRR10752881_DN268_c0_g1_i6	QID88588.1	84.491	91.44	0.0
Mesenchytraeus_armatus_SRR10997443_DN150_c0_g1_i5	QID88588.1	71.494	83.22	0.0
Mesenchytraeus_solifugus_SRR10997441_DN1698_c0_g1_i5	QID88588.1	71.363	83.14	0.0
Metaphire_guillelmi_DN40_c0_g1_i10	BAH22180.1	94.432	97.22	0.0
Metaphire_guillelmi_DN40_c0_g1_i7	BAH22180.1	88.631	94.20	0.0
Metaphire_guillelmi_DN40_c1_g1_i1	BAH22180.1	78.037	87.15	0.0
Metaphire_guillelmi_SRR8334746_DN262_c0_g1_i4	BAH22180.1	94.896	97.45	0.0
Metaphire_guillelmi_SRR8334746_DN262_c0_g1_i5	BAH22180.1	89.277	95.10	0.0
Metaphire_guillelmi_SRR8334746_DN262_c1_g1_i1	BAH22180.1	78.271	87.15	0.0
Phreodrilidae_sp._A_SRR10997437_DN24633_c0_g1_i1	QID88588.1	69.031	77.54	0.0
Pristina_leidyi_SRR18855098_DN3110_c1_g1_i1	BAH22180.1	71.926	83.76	0.0
Randiella_sp._SRR10997431_DN142243_c0_g1_i1	BAH22180.1	69.606	80.97	0.0
