# Supplementary material for: Trophic Position of the White Worm (Enchytraeus albidus) in the Context of Digestive Enzyme Genes Revealed by Transcriptomics Analysis
Source: Int J Mol Sci. 2024 Apr 25;25(9):4685. doi: 10.3390/ijms25094685 (PMC11083476; doi:10.3390/ijms25094685)
Supplement: Supplementary file 1 [file ijms-25-04685-s001.zip › Supplementary Table S2. BLASTp searches of digestive i-type lysozyme.xlsx]

## Sheet: Arkusz1
	Query (mature protein sequence)	Best Hit Acc.	% Identity	% Positives	Alignment length	Evalue
1	QBC73604.1_invertebrate-type_lysozyme_Eisenia_andrei	QBC73604.1	100.000	100.00	210	1.91e-148
2	Capilloventer_australis_SRR8799324_DN2020_c0_g1_i1.p1	QBC73604.1	66.509	78.30	212	2.22e-96
3	Carpetania_elisae_digestive_tissue_SRR786598_DN914_c0_g1_i1.p1	QBC73604.1	76.667	86.19	210	5.21e-115
4	Enchytraeus_albidus_GER_DN2033_c0_g1_i1.p1	QBC73604.1	65.877	78.67	211	3.39e-97
5	Enchytraeus_albidus_GER_DN533_c0_g1_i11.p1	QBC73604.1	65.877	78.20	211	2.63e-97
6	Enchytraeus_albidus_GER_DN533_c0_g1_i14.p1	QBC73604.1	65.877	78.67	211	1.80e-97
7	Enchytraeus_albidus_PLA_DN4298_c0_g1_i5.p1	QBC73604.1	65.877	79.15	211	2.55e-97
8	Enchytraeus_albidus_PLA_DN4298_c0_g1_i7.p1	QBC73604.1	65.877	78.67	211	2.47e-97
9	Enchytraeus_crypticus_SRR10997417_DN1321_c0_g1_i13.p1	QBC73604.1	65.403	78.20	211	1.49e-96
10	Enchytraeus_crypticus_SRR10997417_DN1321_c0_g1_i17.p1	QBC73604.1	65.877	78.20	211	8.05e-97												% identity	alignment length	mismatches	gap opens	q. start	q. end	s. start	s. end	evalue	bit score	% positives
11	Glossoscolex_paulistus_GBIL01089837.1.p1	QBC73604.1	81.905	89.52	210	4.79e-121
12	Guaranidrilus_SRR10997448_DN1107_c0_g1_i2.p1	QBC73604.1	64.929	79.15	211	4.30e-96
13	Lumbriculus_variegatus_SRR12619268_SRR12619270	QBC73604.1	74.762	83.81	210	2.87e-112												% identity	alignment length	mismatches	gap opens	q. start	q. end	s. start	s. end	evalue	bit score	% positives
14	Lumbricus_castaneus_SRR7287337_DN2408_c0_g1_i2.p1	QBC73604.1	82.857	89.05	210	2.07e-124
15	Lumbricus_rubellus_SRR10752881_DN614_c0_g1_i1.p1	QBC73604.1	85.714	90.95	210	4.92e-128
16	Lumbricus_rubellus_SRR10752881_DN614_c0_g1_i5.p1	QBC73604.1	82.381	89.52	210	1.33e-122												% identity	alignment length	mismatches	gap opens	q. start	q. end	s. start	s. end	evalue	bit score	% positives
17	Mesenchytraeus_armatus_SRR10997443_DN1853_c0_g1_i16.p1	QBC73604.1	66.667	80.95	210	3.88e-100
18	Mesenchytraeus_solifugus_SRR10997441_DN1443_c0_g1_i3.p1	QBC73604.1	65.714	79.05	210	4.66e-99
19	Metaphire_guillelmi_SRR8334746_DN274_c0_g1_i2.p1	QBC73604.1	77.619	84.76	210	6.50e-116												% identity	alignment length	mismatches	gap opens	q. start	q. end	s. start	s. end	evalue	bit score	% positives
20	Metaphire_guillelmi_SRR8334746_DN274_c0_g1_i3.p1	QBC73604.1	77.619	84.76	210	6.50e-116
21	Phreodrilidae_sp._A_SRR10997437_DN69742_c0_g1_i2.p1	QBC73604.1	68.246	78.20	211	2.79e-98
22	Trichodrilus_strandi_SRR10997427_TRINITY_DN99_c0_g1_i11.p1	QBC73604.1	74.528	82.08	212	5.88e-107
23	Potamothrix_nr._heuscheri_SRR10997432_DN1473_c0_g1_i3.p1	QBC73604.1	69.524	78.10	210	1.11e-96
24	Bathydrilus_sp._SRR10997421_DN162_c0_g1_i3.p1	QBC73604.1	69.484	77.46	213	3.71e-95
25	Pristina_leidyi_SRR18855098_DN140976_c0_g1_i1.p1	QBC73604.1	63.810	75.71	210	1.09e-90
26	Paranais_sp._SRR10997439_DN2858_c0_g1_i1.p1	QBC73604.1	64.151	78.30	212	6.50e-92
