# Supplementary material for: Trophic Position of the White Worm (Enchytraeus albidus) in the Context of Digestive Enzyme Genes Revealed by Transcriptomics Analysis
Source: Int J Mol Sci. 2024 Apr 25;25(9):4685. doi: 10.3390/ijms25094685 (PMC11083476; doi:10.3390/ijms25094685)
Supplement: Supplementary file 1 [file ijms-25-04685-s001.zip › Supplementary Table S3. Sequencing run IDs for the additional data assembly.xlsx]

## Sheet: Arkusz3
Species	IDs for assembly	Source
Bathydrilus sp.	SRR10997421	SRA
Capilloventer australis	SRR8799324	SRA
Capilloventer australis	SRR10997420	SRA
Carpetania elisae	SRR786598	SRA
Eisenia andrei	SRR11091733, SRR11091734, SRR11091735	SRA
Enchytraeus albidus German strain	SRR5633671, SRR5633673, SRR5633674, SRR5633678,SRR5633679, SRR5633680	SRA
Enchytraeus albidus Nuuk strain	SRR5633669, SRR5633670, SRR5633672, SRR5633676, SRR5633677, SRR5633681	SRA
Enchytraeus crypticus	SRR10997417	SRA
Glossoscolex paulistus	GBIL00000000	TSA
Grania simonae	SRR10997449	SRA
Guaranidrilus sp.	SRR10997448	SRA
Hrabeiella periglandulata	SRR10997424	SRA
Lumbriculus variegatus	SRR12619268, SRR12619269, SRR12619270	SRA
Lumbricus castaneus	SRR7287337	SRA
Lumbricus rubellus	SRR10752881	SRA
Mesenchytraeus armatus	SRR10997443	SRA
Mesenchytraeus solifugus	SRR10997441	SRA
Metaphire guillelmi	SRR8334746	SRA
Paranais sp.	SRR10997439	SRA
Phreodrilidae sp. A	SRR10997437	SRA
Potamothrix nr. heuscheri	SRR10997432	SRA
Pristina leidyi	SRR18855098	SRA
Trichodrilus strandi	SRR10997427	SRA
Randiella sp.	SRR10997431	SRA
